# Supplementary material
Source: PubMed Central journal article supplement (PMC7505555)
Supplement: mmc1.pdf [file mmc1.pdf]

# THE LANCET

## Global Health

### Supplementary appendix

This appendix formed part of the original submission. We post it as supplied by the authors.

Supplement to: Ofori-Acquah SF, on behalf of the SickGenAfrica Network.  
The SickGenAfrica Network. *Lancet Glob Health* 2020; **8**: e1255–56.

## **SickleGenAfrica Network members**

### **Coordinating Centre**

Korle Bu Teaching Hospital, Accra, Ghana and University of Ghana, Accra, Ghana  
Amma Benneh-Akwasi Kuma, Anita Ghansah, Catherine Segbefia, David Nana Adjei,  
Edeghonghon Olayemi, Gordon Awandare, Solomon F. Ofori-Acquah, William Kudzi

### **Collaborative Sites**

Komfo Anokye Teaching Hospital, Kumasi, Ghana and Kwame Nkrumah University of Science and Technology, Kumasi, Ghana  
Ellis Owusu-Dabo, Vivian Painstil

Aminu Kano Teaching Hospital, Kano, Nigeria, Bayero University, Kano, Nigeria and Murtala Mohammad Specialist Hospital, Kano, Nigeria  
Aisha Kuliya-Gwarzo, Adullahi Shehu, Baba Musa, Mahmoud Sani, Najibah Aliyu Galandanci

Institute of Human Virology Nigeria, Abuja, Nigeria and University of Abuja, Abuja, Nigeria  
Alashle Abimiku, Ameh Adeyefa, Obiageli E. Nnodu

Lagos University Teaching Hospital, Lagos, Nigeria and University of Lagos, Nigeria  
Michael Akinsete, Olufunto Kalejaiye, Titilope Adeyemo

Muhimbili University of Health and Allied Sciences, Dar es Salaam, Tanzania  
Floro Ndobho, Furahini Tluway, Julie Makani, Siana Nkya

University of Cape Town  
Nicola Mulder

Imperial College London, London, UK  
Kofi Anie, MBE

Morehouse School of Medicine, Atlanta, USA  
Jonathan Stiles

University of Pittsburgh, Pittsburgh, USA  
Flordeliza Villanueva, Samit Ghosh, Solomon Ofori-Acquah, Ryan Minster



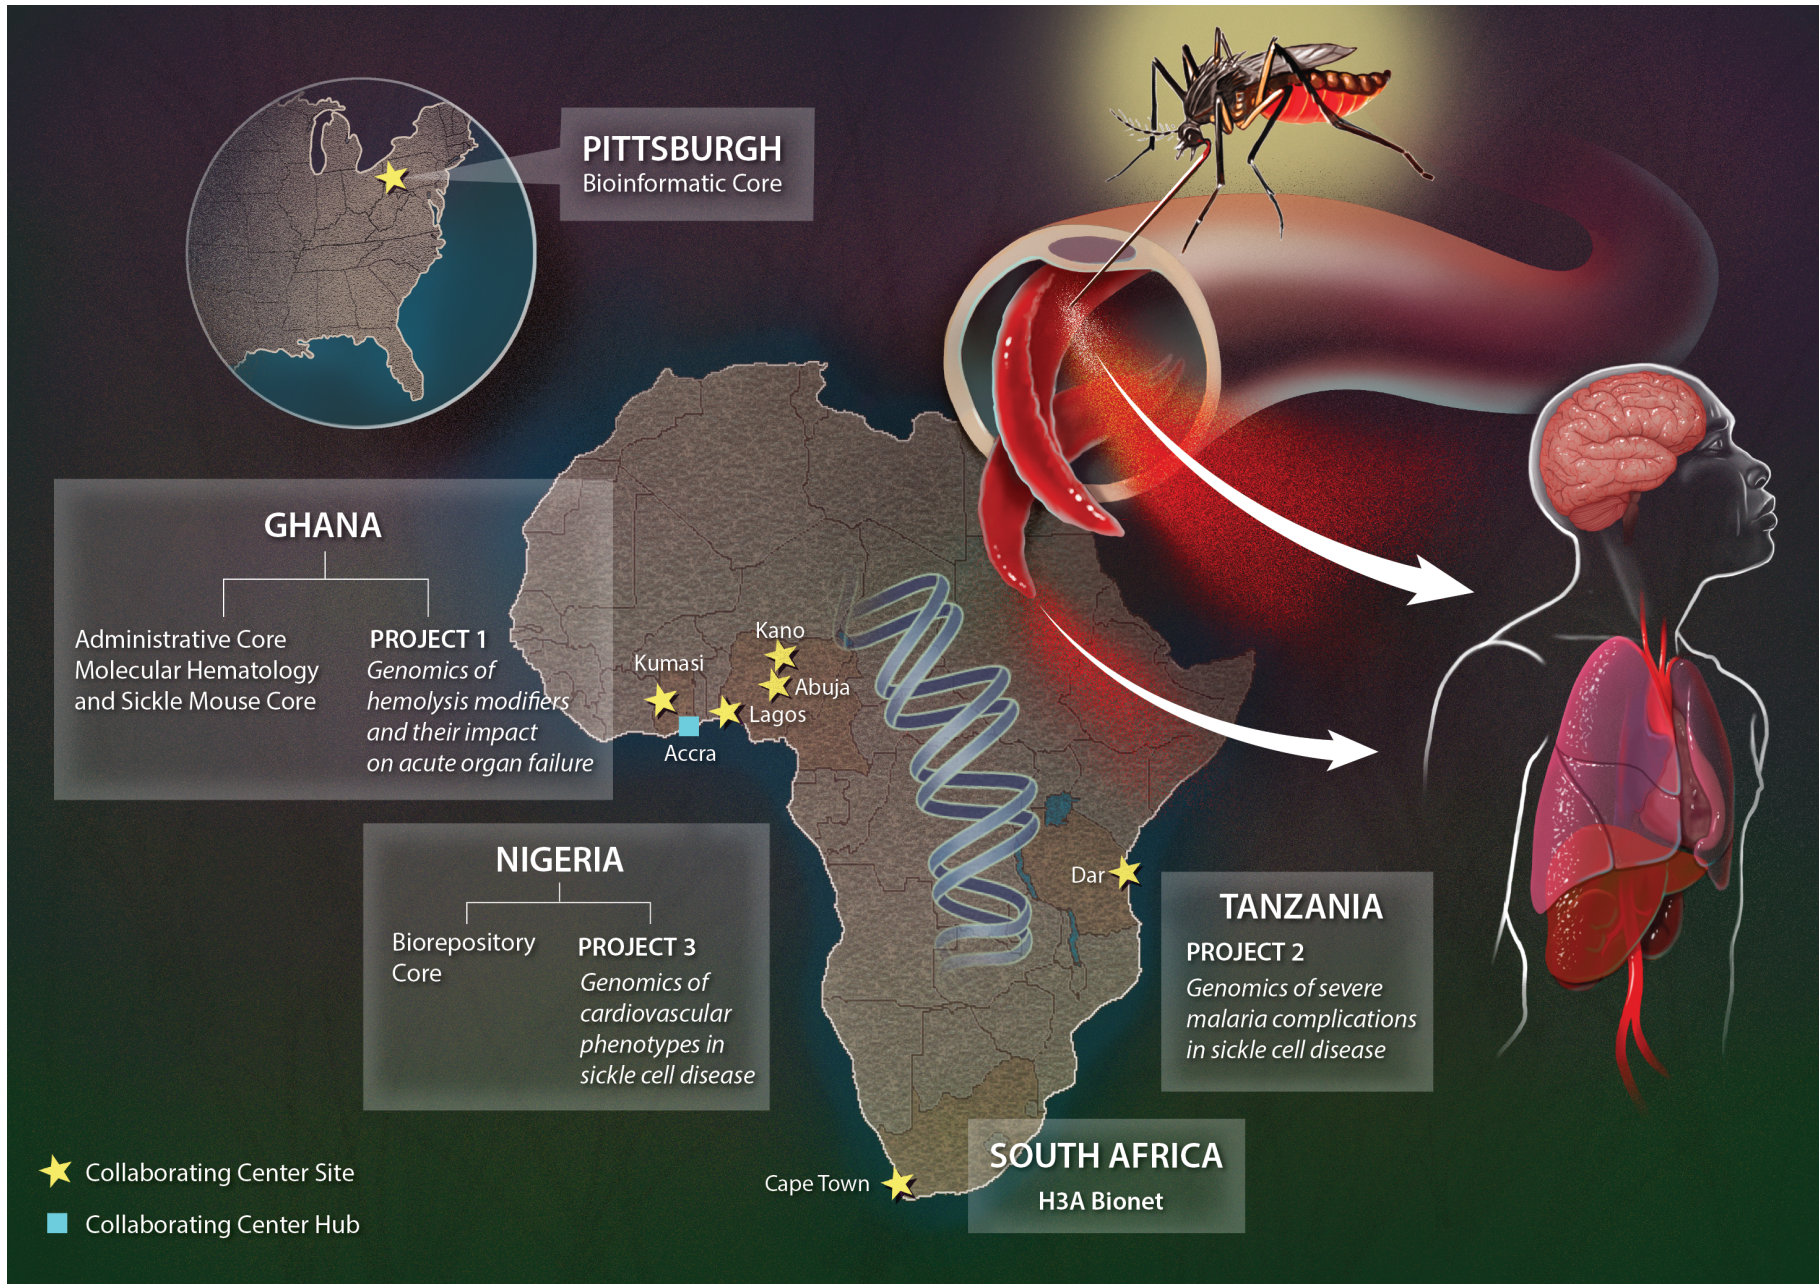

**Figure 1. Overall Concept and Organization of the SickleGenAfrica Network.** SickleGenAfrica is an international collaborative project operating in multiple institutions in Africa, and the University of Pittsburgh, USA with a focus on the role and mechanism of haemolysis cytoprotective pathways on organ dysfunction in sickle cell disease. Network activities are organized into three research projects, several scientific cores and a coordinating centre located in the University of Ghana, Accra, Ghana. Project 1 is focused on genome wide association studies of cytoprotective proteins that neutralize the major alarmins released by intravascular haemolysis notably cell-free haemoglobin, extracellular haem and free iron. Project 2 examines the interaction between sickle cell disease and malaria, and Project 3 examines the role of cytoprotective gene variants on the risk of echocardiographic disease among adult sickle cell disease patients.
